# Supplementary material for: Positive Erfahrungen von Fachassistent:innen und Ärzt:innen hinsichtlich des Delegations-Forschungsprojekts StärkeR
Source: Springer Nature journal article supplement (doi:10.1007/s00393-022-01298-y), 2022-12-09
Supplement: MOESM1 [file 23808148]

Record ID \_\_\_\_\_

## 1. Wir befragen Sie zunächst zur Ihrer persönlichen Einschätzung bezüglich der Erreichung der Ziele des StärkeR-Konzeptes.

1.1 Die Krankheitsaktivität der Patienten ist in der Gruppe mit Delegation an die RFA nach einem Jahr genauso gut wie bei Betreuung durch den Rheumatologen allein.

Stimme voll und ganz zu  
 Stimme eher zu  
 Stimme eher nicht zu  
 Stimme überhaupt nicht zu  
 keine Meinung

1.2 Die gesundheitsbezogene Lebensqualität der Patienten ist in der Gruppe mit Delegation an die RFA nach einem Jahr besser als bei Betreuung durch den Rheumatologen allein.

Stimme voll und ganz zu  
 Stimme eher zu  
 Stimme eher nicht zu  
 Stimme überhaupt nicht zu  
 keine Meinung

1.3 Der zeitliche Aufwand für Kontrolluntersuchungen, an denen die RFA mitwirkt, steht in einem guten Verhältnis zum Nutzen.

Stimme voll und ganz zu  
 Stimme eher zu  
 Stimme eher nicht zu  
 Stimme überhaupt nicht zu  
 keine Meinung

1.4 Das Behandlungsprinzip "treat-to-target" kann bei Betreuung durch den Rheumatologen allein besser umgesetzt werden als bei Delegation von Teilen der Kontrolluntersuchungen an die RFA.

Stimme voll und ganz zu  
 Stimme eher zu  
 Stimme eher nicht zu  
 Stimme überhaupt nicht zu  
 keine Meinung

## 2. Einschätzung der Schulung/Vorbereitung der RFA

2.1 Die Schulung war für die Delegation im Rahmen der Kontrolluntersuchung sinnvoll.

Stimme voll und ganz zu  
 Stimme eher zu  
 Stimme eher nicht zu  
 Stimme überhaupt nicht zu  
 keine Meinung

2.2 Ein weiterer Auffrischkurs wäre im Verlauf hilfreich gewesen.

Stimme voll und ganz zu  
 Stimme eher zu  
 Stimme eher nicht zu  
 Stimme überhaupt nicht zu  
 keine Meinung

2.3 Die Schulung hat die RFA ausreichend vorbereitet.

Stimme voll und ganz zu  
 Stimme eher zu  
 Stimme eher nicht zu  
 Stimme überhaupt nicht zu  
 keine Meinung

- 2.4  
Es waren häufig Hinweise/Informationen meinerseits zur Kontrolluntersuchung notwendig.
- Stimme voll und ganz zu  
 Stimme eher zu  
 Stimme eher nicht zu  
 Stimme überhaupt nicht zu  
 keine Meinung

### 3. Bitte teilen Sie uns nun mit, wie es Ihnen bei der Umsetzung des StärkeR-Konzeptes ergangen ist.

- 3.1  
Die Delegation hat mir mehr Zeit für andere Patienten verschafft.
- Stimme voll und ganz zu  
 Stimme eher zu  
 Stimme eher nicht zu  
 Stimme überhaupt nicht zu  
 keine Meinung

- 3.2  
Durch die Delegation habe ich weniger Zeit mit Routinearbeiten bei den delegierten Patienten verbracht.
- Stimme voll und ganz zu  
 Stimme eher zu  
 Stimme eher nicht zu  
 Stimme überhaupt nicht zu  
 keine Meinung

- 3.3  
Nach Rücksprache mit mir hat die RFA den Medikamentenplan aktualisiert und ohne mein Beisein mit dem Patienten besprochen.
- Stimme voll und ganz zu  
 Stimme eher zu  
 Stimme eher nicht zu  
 Stimme überhaupt nicht zu  
 keine Meinung

- 3.4  
Die Rücksprache/Kommunikation mit der RFA hat zufriedenstellend funktioniert.
- Stimme voll und ganz zu  
 Stimme eher zu  
 Stimme eher nicht zu  
 Stimme überhaupt nicht zu  
 keine Meinung

4.  
Sollte die Delegation von ärztlichen Leistungen auf die RFA finanziell honoriert werden?
- ja  
 nein

### 5. Ihre Einschätzung zur Patientenzufriedenheit

- 5.1  
Die Patienten waren zufrieden mit der Untersuchung der RFA.
- Trifft voll und ganz zu  
 Trifft eher zu  
 Trifft eher nicht zu  
 Trifft überhaupt nicht zu  
 Keine Meinung

- 5.2  
Die Rückmeldung der Patienten zur delegierten Kontrolluntersuchung war durchweg positiv.
- Trifft voll und ganz zu  
 Trifft eher zu  
 Trifft eher nicht zu  
 Trifft überhaupt nicht zu  
 Keine Meinung

- 5.3  
Die Patienten wünschen eine Fortführung der (Mit-)Betreuung durch die RFA.
- Trifft voll und ganz zu  
 Trifft eher zu  
 Trifft eher nicht zu  
 Trifft überhaupt nicht zu  
 Keine Meinung

**6. Ihre Gesamtbewertung des Konzeptes und Meinung zur Weiterführung**

**Bedenken Sie hierbei bitte, dass studienbezogene Aspekte, wie die Terminabsprache mit dem Assessor und die Dokumentation in den CRFs, nicht Teil des Konzeptes sind!!**

**Vergeben Sie bitte Schulnoten: Sehr gut (1) - ungenügend (6).**

6.1  
Das StärkeR-Konzept der Delegation von  
Kontrolluntersuchungen finde ich...

sehr gut  
 gut  
 befriedigend  
 ausreichend  
 mangelhaft  
 ungenügend

6.2  
Die Umsetzbarkeit im Praxis-/Klinikalltag war...

sehr gut  
 gut  
 befriedigend  
 ausreichend  
 mangelhaft  
 ungenügend

6.3  
Die Möglichkeiten zur Weiterführung sind...

sehr gut  
 gut  
 befriedigend  
 ausreichend  
 mangelhaft  
 ungenügend

6.4  
Ich sehe Hinderungsgründe für die Weiterführung im  
Praxis-/Klinikalltag.

nein  
 ja

Welche Hinderungsgründe sehen Sie (Stichworte, max. drei Aspekte)

1.

\_\_\_\_\_

2.

\_\_\_\_\_

3.

\_\_\_\_\_
