# Supplementary material for: Positive Erfahrungen von Fachassistent:innen und Ärzt:innen hinsichtlich des Delegations-Forschungsprojekts StärkeR
Source: Springer Nature journal article supplement (doi:10.1007/s00393-022-01298-y), 2022-12-09
Supplement: MOESM3 [file 23808148]

## Leitfaden Fokusgruppe

### Checkliste: Einführung

- Für Teilnahme bedanken
- Eigene Vorstellung (Angaben zur eigenen Person)
- Ansprache klären (Du/Sie)
- Vorgehen beschreiben (Thema, Dauer)
- Informationsblatt, Datenschutzerklärung, Einverständniserklärung, Aufwandsentschädigung
- Offene Fragen klären

### **Aufnahme starten**

## Alle einmal vorstellen (Name, Praxis) – zur Orientierung für Transkript

| Leitfragen (Erzählaufforderung)                                                                             | Checkliste (erwähnte Informationen)                                                                                                                                                                                 | Konkrete Nachfragen                                                                                                                                                                                 |
|-------------------------------------------------------------------------------------------------------------|---------------------------------------------------------------------------------------------------------------------------------------------------------------------------------------------------------------------|-----------------------------------------------------------------------------------------------------------------------------------------------------------------------------------------------------|
| <b>Teil I: Einstieg / Allgemeine Erfahrungen</b>                                                            |                                                                                                                                                                                                                     |                                                                                                                                                                                                     |
| Denken Sie noch einmal an einen Patienten, den Sie untersucht haben und beschreiben Sie den genauen Ablauf. | <ul style="list-style-type: none"> <li>○ Aufgaben der RFA</li> <li>○ Dauer der Untersuchung</li> <li>○ Unterschiede</li> </ul>                                                                                      | ○                                                                                                                                                                                                   |
| Jetzt beschreiben Sie einmal bitte einen Fall, bei dem es Probleme gab.                                     | <ul style="list-style-type: none"> <li>○ Wo/Welche Probleme (mit Arzt, mit Patient, eigene Kompetenzen)</li> <li>○ Warum? (Gründe für Probleme)</li> <li>○ Ähnliche Probleme in unterschiedlichen Praxen</li> </ul> | Weshalb sind diese Probleme Ihrer Meinung nach aufgetreten?<br><b>Wie hätte man den Problemen entgegenwirken können?</b> (mögl. Überleitung zur Schulung?)                                          |
| Wie hat die Zusammenarbeit mit dem Arzt funktioniert?                                                       | <ul style="list-style-type: none"> <li>○ Auswirkungen auf die Untersuchung</li> </ul>                                                                                                                               |                                                                                                                                                                                                     |
| <b>Teil II: Schulung</b>                                                                                    |                                                                                                                                                                                                                     |                                                                                                                                                                                                     |
| Was ist Ihnen bei der Schulung positiv in Erinnerung geblieben?                                             |                                                                                                                                                                                                                     |                                                                                                                                                                                                     |
| Was hat Ihnen bei der Schulung nicht so gut gefallen?                                                       | <ul style="list-style-type: none"> <li>○ Welche Themen hätten Sie sich gewünscht?</li> <li>○ Vertiefung?</li> </ul>                                                                                                 |                                                                                                                                                                                                     |
| Hätten Sie die Aufgaben/Kontrolluntersuchung auch ohne die Schulung bewältigen können?                      | <ul style="list-style-type: none"> <li>○ Vorkenntnisse?</li> </ul>                                                                                                                                                  | Wenn ja: Warum?<br>Wenn nein: Welche erlernten Inhalte waren besonders hilfreich?                                                                                                                   |
| <b>Teil III: Konzept und Umsetzbarkeit</b><br>(passt auch zu Teil I)                                        |                                                                                                                                                                                                                     |                                                                                                                                                                                                     |
| Führen Sie das Konzept der Delegation nach Studienende weiter?                                              |                                                                                                                                                                                                                     | <ul style="list-style-type: none"> <li>○ Wenn ja: Unter welchen Bedingungen?</li> <li>○ In welchem Ausmaß?</li> <li>○ Wenn nein: Warum nicht? (fehlende Voraussetzungen, kein Interesse)</li> </ul> |

|                                                                                                          |                                                                                                                                                                           |                                                                                                                                                                                                                                                                                                                                                                                                                                                        |
|----------------------------------------------------------------------------------------------------------|---------------------------------------------------------------------------------------------------------------------------------------------------------------------------|--------------------------------------------------------------------------------------------------------------------------------------------------------------------------------------------------------------------------------------------------------------------------------------------------------------------------------------------------------------------------------------------------------------------------------------------------------|
| (Welche Vorteile sehen Sie in dem Konzept der Delegation von Kontrolluntersuchungen an RFAs?)            | <ul style="list-style-type: none"> <li>○ Vorteile für RFA, Arzt, Patienten?</li> </ul>                                                                                    | ~ bei Bedarf einführen, wird wahrscheinlich schon vorher abgehandelt.                                                                                                                                                                                                                                                                                                                                                                                  |
| Welche Voraussetzungen müssten erfüllt werden damit dieses Konzept in Ihre Praxis etabliert werden kann? | <ul style="list-style-type: none"> <li>○ Probleme, Wünsche</li> <li>○ Überhaupt gewünscht oder machbar?</li> <li>○ Bezug zu Hinderungsgründe für Weiterführung</li> </ul> |                                                                                                                                                                                                                                                                                                                                                                                                                                                        |
| <b>Teil IV: Persönliche Meinung</b>                                                                      |                                                                                                                                                                           |                                                                                                                                                                                                                                                                                                                                                                                                                                                        |
| Wie hat Ihnen die Mitwirkung bei den Untersuchungen gefallen?                                            | <ul style="list-style-type: none"> <li>○ Mögliche Verbesserungen</li> <li>○ Positive/Negative Aspekte</li> </ul>                                                          | <p>Können Sie sich diese Aufgaben in Zukunft auch vorstellen?</p> <p>Können Sie Ihre Antwort näher erläutern?<br/>(ggf. näher nachfragen: -Trauen Sie sich diese Aufgabe auch in Zukunft zu?</p> <p>-Empfinden Sie es als eine zusätzliche Arbeitsbelastung?</p> <p>-Konnten Sie durch die Delegation mehr Verantwortung übernehmen?</p> <p>-Würden Sie sagen, dass durch die Delegation das Arbeitsklima verbessert wird (Entlastung des Arztes)?</p> |
| <b>Teil V: Ende</b>                                                                                      |                                                                                                                                                                           |                                                                                                                                                                                                                                                                                                                                                                                                                                                        |
| Fällt Ihnen noch etwas ein was Sie ansprechen möchten was wir noch nicht erwähnt haben?                  |                                                                                                                                                                           |                                                                                                                                                                                                                                                                                                                                                                                                                                                        |
| <b>Für Teilnahme bedanken. Ende 😊</b>                                                                    |                                                                                                                                                                           |                                                                                                                                                                                                                                                                                                                                                                                                                                                        |
