# Supplementary material for: Positive experiences of specialist assistants and physicians with respect to the delegation research project StaerkeR: Evaluation of the training and experiences within the framework of this project
Source: Z Rheumatol. 2022 Dec 9;83(3):175–85. [Article in German] doi: 10.1007/s00393-022-01298-y (PMC10973023; doi:10.1007/s00393-022-01298-y)
Supplement: Supplementary file 2 [file 393_2022_1298_MOESM2_ESM.pdf]

Record ID

**Um die Fragen kurz und gut lesbar zu halten, gelten die Personenbezeichnungen für beide Geschlechter.**

**1. Bitte teilen Sie uns Ihre Meinung zur Schulung mit.**

1.1. Die Schulung war für die Mitarbeit bei der Kontrolluntersuchung sinnvoll.

- ☐ Stimme voll und ganz zu
- ☐ Stimme eher zu
- ☐ Stimme eher nicht zu
- ☐ Stimme überhaupt nicht zu
- ☐ keine Meinung

**1.2. Bitte bewerten Sie die einzelnen Aspekte der Schulung.**

1.2.1. Organisation

- ☐ Sehr gut
- ☐ gut
- ☐ zufriedenstellend
- ☐ weniger gut
- ☐ schlecht
- ☐ keine Meinung

1.2.2. Auswahl der Inhalte

- ☐ Sehr gut
- ☐ gut
- ☐ zufriedenstellend
- ☐ weniger gut
- ☐ schlecht
- ☐ keine Meinung

1.2.3. Verständlichkeit der Inhalte

- ☐ Sehr gut
- ☐ gut
- ☐ zufriedenstellend
- ☐ weniger gut
- ☐ schlecht
- ☐ keine Meinung

1.2.4. Lehrpersonen/Vortragende

- ☐ Sehr gut
- ☐ gut
- ☐ zufriedenstellend
- ☐ weniger gut
- ☐ schlecht
- ☐ keine Meinung

1.2.5. Schulung insgesamt

- ☐ Sehr gut
- ☐ gut
- ☐ zufriedenstellend
- ☐ weniger gut
- ☐ schlecht
- ☐ keine Meinung

### 1.3. Wie wurden Sie durch die Schulung auf die folgenden Aspekte der Kontrolluntersuchung vorbereitet?

- |                                                                       |                                                                                                                                                                                                                      |
|-----------------------------------------------------------------------|----------------------------------------------------------------------------------------------------------------------------------------------------------------------------------------------------------------------|
| 1.3.1. Allgemeine Anamnese                                            | <input type="radio"/> Sehr gut<br><input type="radio"/> gut<br><input type="radio"/> zufriedenstellend<br><input type="radio"/> weniger gut<br><input type="radio"/> schlecht<br><input type="radio"/> keine Meinung |
| 1.3.2. Anamnese neuer Erkrankungen                                    | <input type="radio"/> Sehr gut<br><input type="radio"/> gut<br><input type="radio"/> zufriedenstellend<br><input type="radio"/> weniger gut<br><input type="radio"/> schlecht<br><input type="radio"/> keine Meinung |
| 1.3.3. Medikamentöse Anamnese                                         | <input type="radio"/> Sehr gut<br><input type="radio"/> gut<br><input type="radio"/> zufriedenstellend<br><input type="radio"/> weniger gut<br><input type="radio"/> schlecht<br><input type="radio"/> keine Meinung |
| 1.3.4. Sozialanamnese                                                 | <input type="radio"/> Sehr gut<br><input type="radio"/> gut<br><input type="radio"/> zufriedenstellend<br><input type="radio"/> weniger gut<br><input type="radio"/> schlecht<br><input type="radio"/> keine Meinung |
| 1.3.5. Körperliche Untersuchung<br>(Bestimmung des CDAI und ggf. BSA) | <input type="radio"/> Sehr gut<br><input type="radio"/> gut<br><input type="radio"/> zufriedenstellend<br><input type="radio"/> weniger gut<br><input type="radio"/> schlecht<br><input type="radio"/> keine Meinung |

- |                                                |                                                        |
|------------------------------------------------|--------------------------------------------------------|
| 1.4. Hat Ihnen bei der Schulung etwas gefehlt? | <input type="radio"/> ja<br><input type="radio"/> nein |
|------------------------------------------------|--------------------------------------------------------|

Was hat Ihnen gefehlt ? (Nennen Sie max. drei Aspekte)

\_\_\_\_\_

\_\_\_\_\_

\_\_\_\_\_

1.5. Haben Sie Verbesserungsvorschläge?

- ☐ ja  
☐ nein

Nennen Sie stichwortartig bis zu drei inhaltliche oder organisatorische Verbesserungsvorschläge:

\_\_\_\_\_

\_\_\_\_\_

\_\_\_\_\_

1.6. Haben Sie am Refresher-Kurs (Mai 2019) teilgenommen?

- ☐ ja  
☐ nein

1.6.1. War der Auffrischkurs Ihrer Meinung nach hilfreich?

- ☐ ja  
☐ nein

1.6.2. Bitte nennen Sie den wesentlichen Grund

- ☐ Keine Zeit  
☐ Nicht notwendig  
☐ Zu dem Zeitpunkt noch nicht am Projekt beteiligt.  
☐ sonstiges

sonstige Gründe:

\_\_\_\_\_

1.7. Hätten Sie sich einen weiteren Auffrischkurs gewünscht?

- ☐ ja  
☐ nein

**2. Bitte teilen Sie uns nun mit, wie es Ihnen bei der Umsetzung des StärkeR-Konzeptes ergangen ist.**

**2.1. Wie sicher haben Sie sich nach einer Einarbeitungszeit von ca. 3 Monaten bei den folgenden Aspekten der Untersuchung der Patienten gefühlt?**

2.1.1. Allgemeine Anamnese

- ☐ Sehr sicher  
☐ überwiegend sicher  
☐ überwiegend unsicher  
☐ sehr unsicher  
☐ keine Meinung

---

2.1.2. Anamnese neuer Erkrankungen

- ☐ Sehr sicher
  - ☐ überwiegend sicher
  - ☐ überwiegend unsicher
  - ☐ sehr unsicher
  - ☐ keine Meinung
- 

2.1.3. Medikamentöse Anamnese

- ☐ Sehr sicher
  - ☐ überwiegend sicher
  - ☐ überwiegend unsicher
  - ☐ sehr unsicher
  - ☐ keine Meinung
- 

2.1.4. Sozialanamnese

- ☐ Sehr sicher
  - ☐ überwiegend sicher
  - ☐ überwiegend unsicher
  - ☐ sehr unsicher
  - ☐ keine Meinung
- 

2.1.5. Körperliche Untersuchung  
(Bestimmung des CDAI und ggf. BSA)

- ☐ Sehr sicher
  - ☐ überwiegend sicher
  - ☐ überwiegend unsicher
  - ☐ sehr unsicher
  - ☐ keine Meinung
- 

2.1.6. Umgang mit dem Patienten insgesamt

- ☐ Sehr sicher
  - ☐ überwiegend sicher
  - ☐ überwiegend unsicher
  - ☐ sehr unsicher
  - ☐ keine Meinung
- 

## 2.2. Wie schätzen Sie folgende Aspekte ein?

2.2.1. Ich konnte die Fragen des Patienten beantworten.

- ☐ immer
  - ☐ oft
  - ☐ selten
  - ☐ nie
- 

2.2.2. Es gab Probleme bei der Untersuchung der Patienten.

- ☐ immer
  - ☐ oft
  - ☐ selten
  - ☐ nie
- 

2.2.3. Ich habe die Checkliste verwendet.

- ☐ immer
- ☐ oft
- ☐ selten
- ☐ nie

2.2.4. Die Checkliste war bei der Durchführung der Kontrolluntersuchung nützlich.

- ☐ immer  
☐ oft  
☐ selten  
☐ nie

2.2.5. Ich habe den Medikamentenplan - wenn nötig - nach Rücksprache mit dem Arzt aktualisiert und mit dem Patienten besprochen.

- ☐ immer  
☐ oft  
☐ selten  
☐ nie

2.2.6. Ich hatte genug Zeit zur Besprechung und Untersuchung des Patienten.

- ☐ immer  
☐ oft  
☐ selten  
☐ nie

2.3. Bitte schätzen Sie die Zeit, die Sie durchschnittlich für die Untersuchung der Patienten aufgewendet haben. (in Minuten)

\_\_\_\_\_

2.4. Wie oft haben die Patienten Sie im Durchschnitt zusätzlich, d.h. über die geplanten vier Kontrolltermine hinaus, (persönlich oder telefonisch) kontaktiert (grobe Schätzung)?

\_\_\_\_\_

## 2.5. Wie hat die Zusammenarbeit mit dem Rheumatologen funktioniert?

2.5.1. Vorstellung des Patienten beim Rheumatologen unter zeitlich/ organisatorischen Gesichtspunkten

- ☐ Sehr gut  
☐ gut  
☐ zufriedenstellend  
☐ weniger gut  
☐ schlecht  
☐ keine Meinung

2.5.2. Vorstellung des Patienten beim Rheumatologen aus inhaltlicher Sicht

- ☐ Sehr gut  
☐ gut  
☐ zufriedenstellend  
☐ weniger gut  
☐ schlecht  
☐ keine Meinung

2.5.3. Rücksprache hinsichtlich der Aktualisierung des Medikamentenplans

- ☐ Sehr gut
- ☐ gut
- ☐ zufriedenstellend
- ☐ weniger gut
- ☐ schlecht
- ☐ keine Meinung

2.5.4. Kooperation/Kommunikation mit dem Rheumatologen insgesamt

- ☐ Sehr gut
- ☐ gut
- ☐ zufriedenstellend
- ☐ weniger gut
- ☐ schlecht
- ☐ keine Meinung

3. Sollte die Delegation von ärztlichen Leistungen auf Sie finanziell honoriert werden?

- ☐ ja
- ☐ nein

#### 4. Ihre Einschätzung zur Patientenzufriedenheit

4.1. Die Patienten waren zufrieden mit der Untersuchung der RFA.

- ☐ Trifft voll und ganz zu
- ☐ Trifft eher zu
- ☐ Trifft eher nicht zu
- ☐ Trifft überhaupt nicht zu
- ☐ keine Meinung

4.2. Die Rückmeldung der Patienten zur delegierten Kontrolluntersuchung war durchweg positiv.

- ☐ Trifft voll und ganz zu
- ☐ Trifft eher zu
- ☐ Trifft eher nicht zu
- ☐ Trifft überhaupt nicht zu
- ☐ keine Meinung

4.3. Die Patienten wünschen eine Fortführung der Mitbetreuung durch die RFA.

- ☐ Trifft voll und ganz zu
- ☐ Trifft eher zu
- ☐ Trifft eher nicht zu
- ☐ Trifft überhaupt nicht zu
- ☐ keine Meinung

#### 5. Ihre Gesamtbewertung des Konzeptes und Meinung zur Weiterführung

**Bedenken Sie hierbei bitte, dass studienbezogene Aspekte, wie die Terminabsprache mit dem Assessor und die Dokumentation in den CRFs, nicht Teil des Konzeptes sind!!**

**Vergeben Sie bitte Schulnoten:**

5.1. Das Stärker-Konzept der Delegation von Kontrolluntersuchungen finde ich...

- ☐ Sehr gut
- ☐ gut
- ☐ befriedigend
- ☐ ausreichend
- ☐ mangelhaft
- ☐ ungenügend

---

5.2. Die Umsetzbarkeit im Praxis-/Klinikalltag war...

- ☐ Sehr gut
  - ☐ gut
  - ☐ befriedigend
  - ☐ ausreichend
  - ☐ mangelhaft
  - ☐ ungenügend
- 

5.3. Die Möglichkeiten zur Weiterführung sind...

- ☐ Sehr gut
  - ☐ gut
  - ☐ befriedigend
  - ☐ ausreichend
  - ☐ mangelhaft
  - ☐ ungenügend
- 

5.4. Ich sehe Hinderungsgründe für die Weiterführung im Praxis-/Klinikalltag.

- ☐ ja
  - ☐ nein
- 

5.4.1. Welche Hinderungsgründe sehen Sie (Stichworte)

---

---

---
